# Supplementary material for: Nickel-substituted Ba0.5Sr0.5Co0.8Fe0.2O3−δ: a highly active perovskite oxygen electrode for reduced-temperature solid oxide fuel cells
Source: Royal Society of Chemistry journal article supplement (doi:10.1039/c9ta02548k), 2019-01-01
Supplement: c9ta02548k1.pdf [file c9ta02548k1.pdf]

**Nickel-substituted  $\text{Ba}_{0.5}\text{Sr}_{0.5}\text{Co}_{0.8}\text{Fe}_{0.2}\text{O}_{3-\delta}$ : a highly active  
perovskite oxygen electrode for reduced-temperature solid oxide  
fuel cells**

**Lu Li,<sup>a</sup> Hua Yang,<sup>a</sup> Zhenghui Gao,<sup>a</sup> Yaping Zhang,<sup>b</sup> Feifei Dong,<sup>a,\*</sup> Guangming  
Yang,<sup>d</sup> Meng Ni<sup>c</sup> and Zhan Lin<sup>a,\*</sup>**

<sup>a</sup> *School of Chemical Engineering and Light Industry, Guangdong University of  
Technology, Guangzhou Higher Education Mega Center, Guangzhou 510006, China.*

<sup>b</sup> *State Key Laboratory of Environment-friendly Energy Materials, School of  
Materials Science and Engineering, Southwest University of Science and Technology,  
Mianyang 621010, China.*

<sup>c</sup> *Building Energy Research Group, Department of Building and Real Estate, The  
Hong Kong Polytechnic University, Hung Hom, Kowloon, Hong Kong 999077, China.*

<sup>d</sup> *State Key Laboratory of Materials-Oriented Chemical Engineering, College of  
Chemical Engineering, Nanjing Tech University, No. 30 Puzhu South Road, Nanjing  
211816, China.*

**\* Corresponding authors. Tel.: +86 020 39320229.**

**E-mail: dongff@gdut.edu.cn; zhanlin@gdut.edu.cn.**

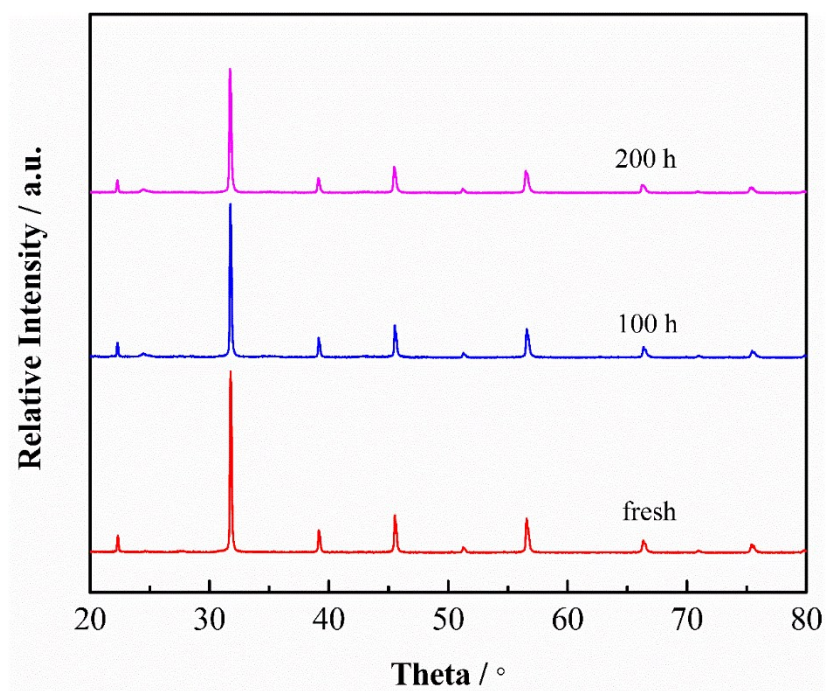

**Fig. S1** XRD patterns of as-synthesized BSCFN after annealing at 600 °C for 100 and 200 h under an air atmosphere.

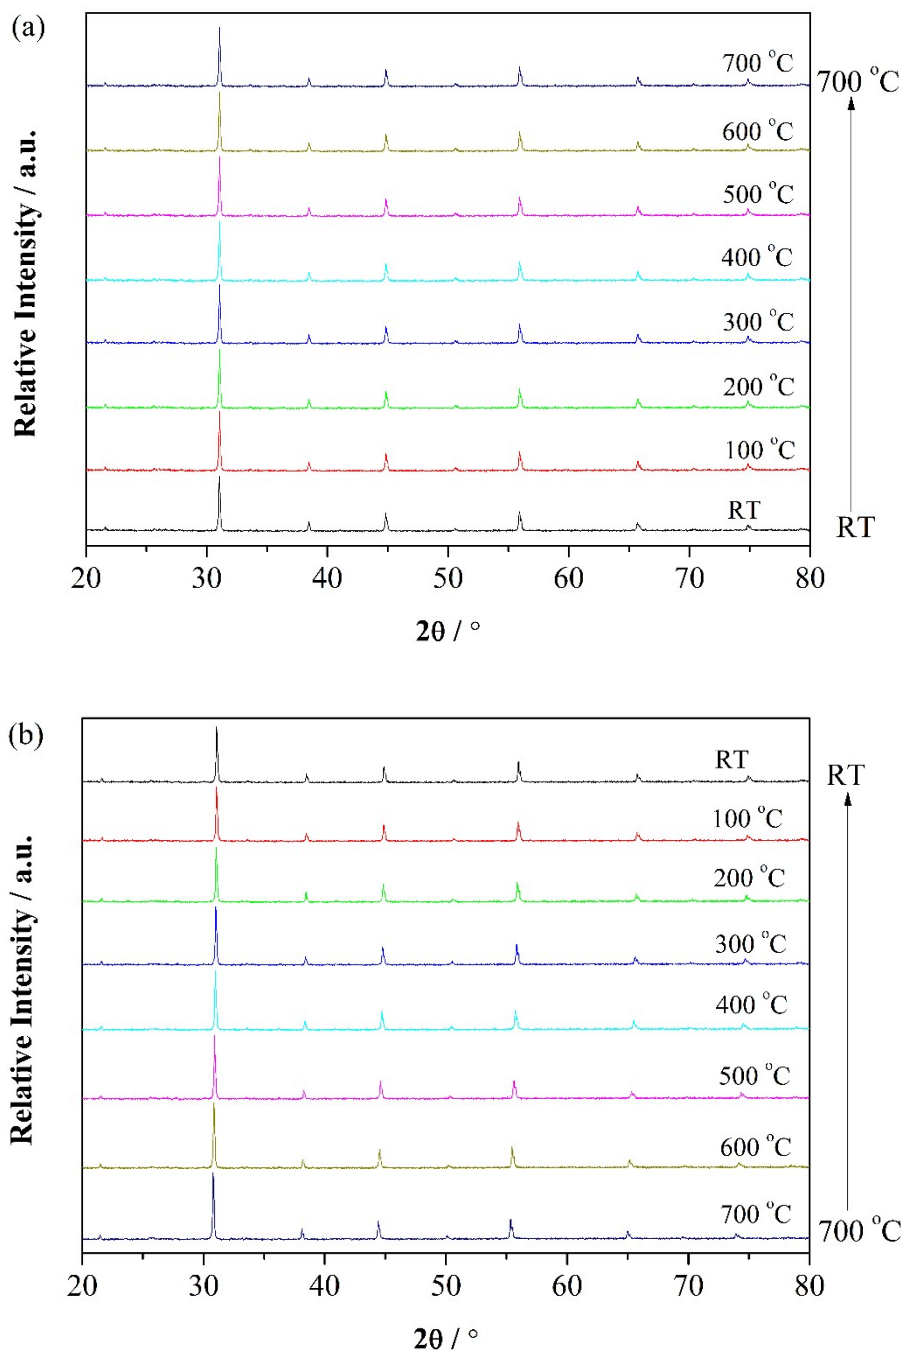

**Fig. S2** HT-XRD patterns of BSCFN powder: (a) heating from room temperature to 700 °C, (b) cooling from 700 °C to room temperature.

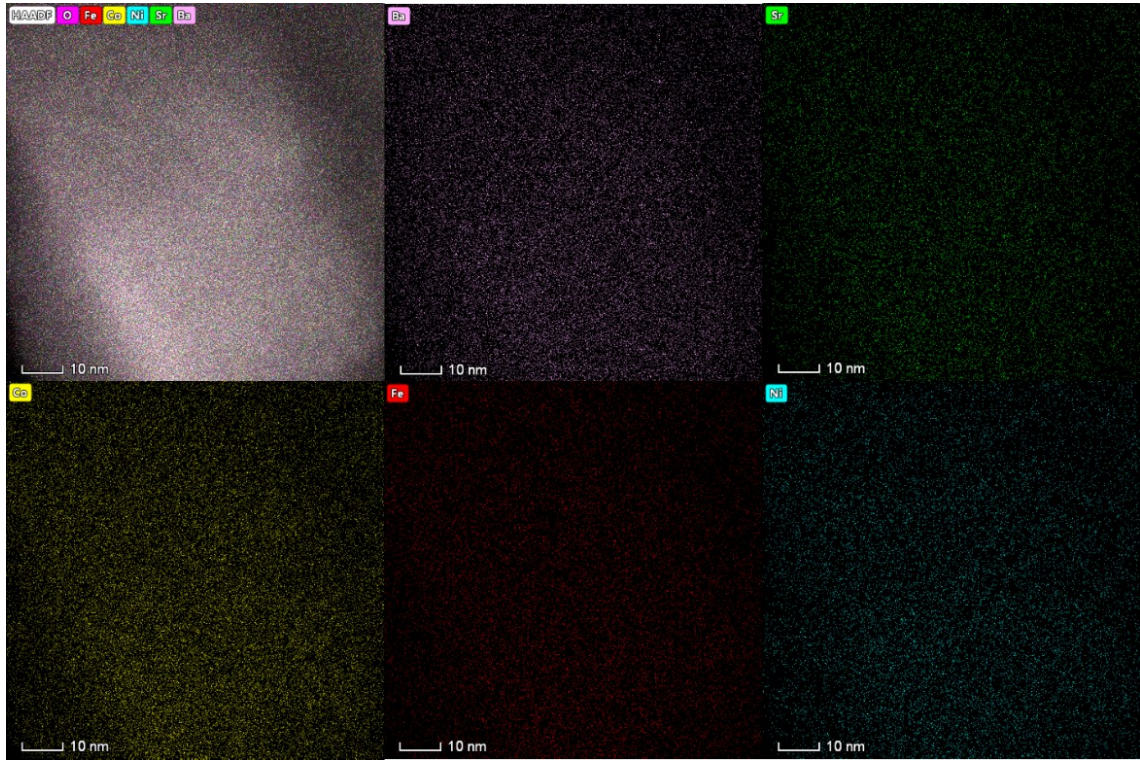

**Fig. S3** EDX mappings of Ba, Sr, Co, Fe, and Ni in BSCFN sample.

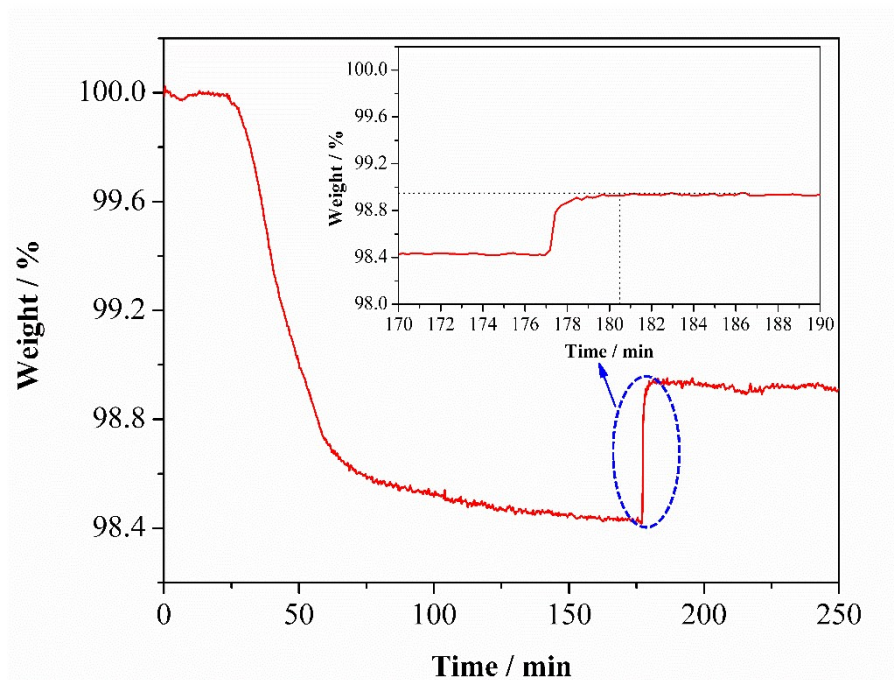

**Fig. S4** Weight change of BSCFN sample after a sudden change in ambient atmosphere from argon to air.

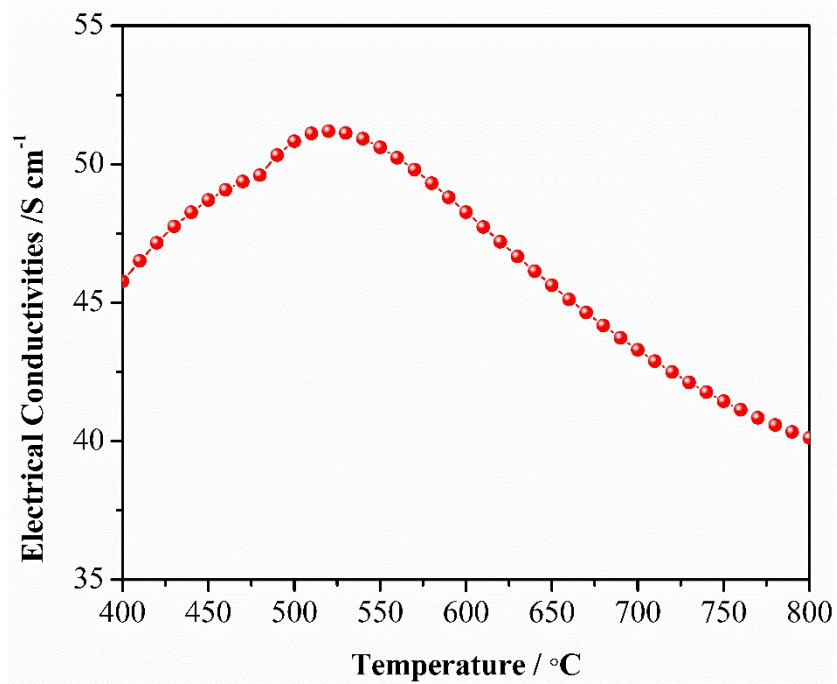

**Fig. S5** Electrical conductivity of BSCFN sample using 4-probe DC method as a function of temperature.

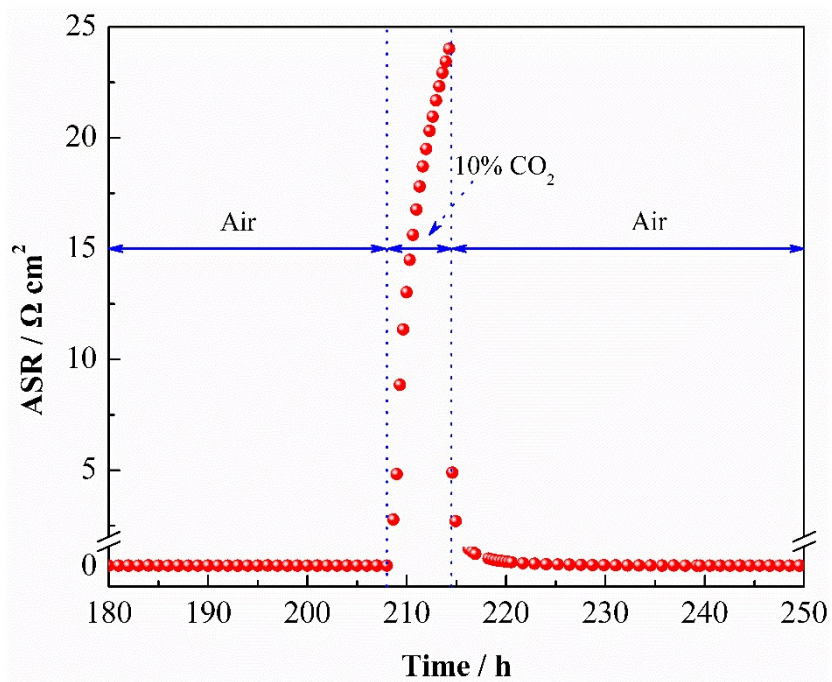

**Fig. S6** Time-dependent polarization ASRs of BSCFN at 600 °C in air, 10 vol.% CO<sub>2</sub>, and air, respectively.

**Table S1** Crystallographic details of BSCFN obtained from the Rietveld refinement of XRD data.

| <b>Atom</b> | <b>Site</b> | <b><i>x</i></b> | <b><i>y</i></b> | <b><i>z</i></b> | <b>Occupancy</b> | <b><math>U_{\text{iso}} (\text{\AA}^2)</math></b> |
|-------------|-------------|-----------------|-----------------|-----------------|------------------|---------------------------------------------------|
| Ba          | <i>1a</i>   | 0               | 0               | 0               | 0.5026           | 0.06641                                           |
| Sr          | <i>1a</i>   | 0               | 0               | 0               | 0.4991           | 0.02865                                           |
| Co          | <i>1b</i>   | 0.5             | 0.5             | 0.5             | 0.6896           | 0.07558                                           |
| Fe          | <i>1b</i>   | 0.5             | 0.5             | 0.5             | 0.2001           | 0.02532                                           |
| Ni          | <i>1b</i>   | 0.5             | 0.5             | 0.5             | 0.1000           | 0.03014                                           |
| O           | <i>3d</i>   | 0.5             | 0.5             | 0               | 0.8949           | 0.10598                                           |



**Table S2** Comparison of maximum power densities of the single cell with highly active cathode materials.

| <b>Anode</b>  | <b>Electrolyte</b> | <b>Cathode</b>                                                                                                                                                 | <b>Power Density<br/>(mW cm<sup>-2</sup>) @600 °C</b> | <b>Ref.</b>      |
|---------------|--------------------|----------------------------------------------------------------------------------------------------------------------------------------------------------------|-------------------------------------------------------|------------------|
| Ni+GDC        | GDC                | La <sub>0.85</sub> Sr <sub>0.15</sub> MnO <sub>3±δ</sub> -(Bi <sub>0.8</sub> Er <sub>0.2</sub> ) <sub>2</sub> O <sub>3</sub>                                   | 1180                                                  | 1                |
| Ni+YSZ        | YSZ                | Bi <sub>0.5</sub> Sr <sub>0.5</sub> Fe <sub>0.9</sub> Sb <sub>0.1</sub> O <sub>3-δ</sub>                                                                       | 950                                                   | 2                |
| Ni+YSZ        | YSZ                | La <sub>1-x</sub> Sr <sub>x</sub> MnO <sub>3</sub> -Bi <sub>1.6</sub> Er <sub>0.4</sub> O <sub>3</sub>                                                         | ~550                                                  | 3                |
| Ni+YSZ        | YSZ                | SrFe <sub>0.85</sub> Ti <sub>0.1</sub> Ni <sub>0.05</sub> O <sub>3-δ</sub>                                                                                     | 684                                                   | 4                |
| Ni+YSZ        | YSZ                | Pr <sub>6</sub> O <sub>11</sub>                                                                                                                                | ~230                                                  | 5                |
| Ni+GDC        | GDC                | BaCoO <sub>3-x</sub> -PrCoO <sub>3-x</sub> -PrBa <sub>0.8</sub> Ca <sub>0.2</sub> Co <sub>2</sub> O <sub>5+δ</sub>                                             | ~1200                                                 | 6                |
| Ni+GDC        | GDC                | La <sub>0.6</sub> Sr <sub>0.4</sub> Co <sub>0.2</sub> Fe <sub>0.8</sub> O <sub>3-δ</sub> -Ce <sub>0.9</sub> Gd <sub>0.1</sub> O <sub>2-δ</sub>                 | 800                                                   | 7                |
| Ni+YSZ        | YSZ                | La <sub>0.6</sub> Sr <sub>0.4</sub> Co <sub>0.2</sub> Fe <sub>0.7</sub> Nb <sub>0.1</sub> O <sub>3-δ</sub> -Er <sub>0.4</sub> Bi <sub>1.6</sub> O <sub>3</sub> | 240                                                   | 8                |
| Ni+BZCYYb     | SDC                | PrBa <sub>0.8</sub> Ca <sub>0.2</sub> Co <sub>2</sub> O <sub>5+δ</sub>                                                                                         | ~590                                                  | 9                |
| Ni+SDC        | SDC                | BSCF                                                                                                                                                           | 1010                                                  | 10               |
| <b>Ni+SDC</b> | <b>SDC</b>         | <b>BSCFN</b>                                                                                                                                                   | <b>1317</b>                                           | <b>This work</b> |

## Supplementary References

- 1 Y. L. Huang, A. M. Hussain, I. A. Robinson and E. D. Wachsman, *ACS Appl. Mater. Interfaces*, 2018, **10**, 28635-28643.
- 2 L. Gao, Q. Li, L. Sun, T. Xia, L. Huo, H. Zhao and J.-C. Grenier, *J. Mater. Chem. A*, 2018, **6**, 15221-15229.
- 3 K. T. Lee, A. A. Lidie, H. S. Yoon and E. D. Wachsman, *Angew. Chem., Int. Ed.*, 2014, **53**, 13463-13467.
- 4 G. Yang, W. Zhou, M. Liu and Z. Shao, *ACS Appl. Mater. Interfaces*, 2016, **8**, 35308-35314.
- 5 R. K. Sharma and E. Djurado, *J. Mater. Chem. A*, 2018, **6**, 10787-10802.
- 6 Y. Chen, Y. Choi, S. Yoo, Y. Ding, R. Yan, K. Pei, C. Qu, L. Zhang, I. Chang, B. Zhao, Y. Zhang, H. Chen, Y. Chen, C. Yang, B. deGlee, R. Murphy, J. Liu and M. Liu, *Joule*, 2018, **2**, 938-949.
- 7 Y.-L. Huang, A. M. Hussain and E. D. Wachsman, *Nano Energy*, 2018, **49**, 186-192.
- 8 S. He, Q. Zhang, G. Maurizio, L. Catellani, K. Chen, Q. Chang, M. Santarelli and S. P. Jiang, *ACS Appl. Mater. Interfaces*, 2018, **10**, 40549-40559.
- 9 Y. Chen, S. Yoo, Y. Choi, J. H. Kim, Y. Ding, K. Pei, R. Murphy, Y. Zhang, B. Zhao, W. Zhang, H. Chen, Y. Chen, W. Yuan, C. Yang and M. Liu, *Energy Environ. Sci.*, 2018, **11**, 2458-2466.
- 10 Z. Shao and S. M. Haile, *Nature*, 2004, **431**, 170-174.
